# Supplementary material
Source: PubMed Central journal article supplement (PMC10995518)
Supplement: noad191_suppl_supplementary_figure_s1-s4.pdf [file noad191_suppl_supplementary_figure_s1-s4.pdf]

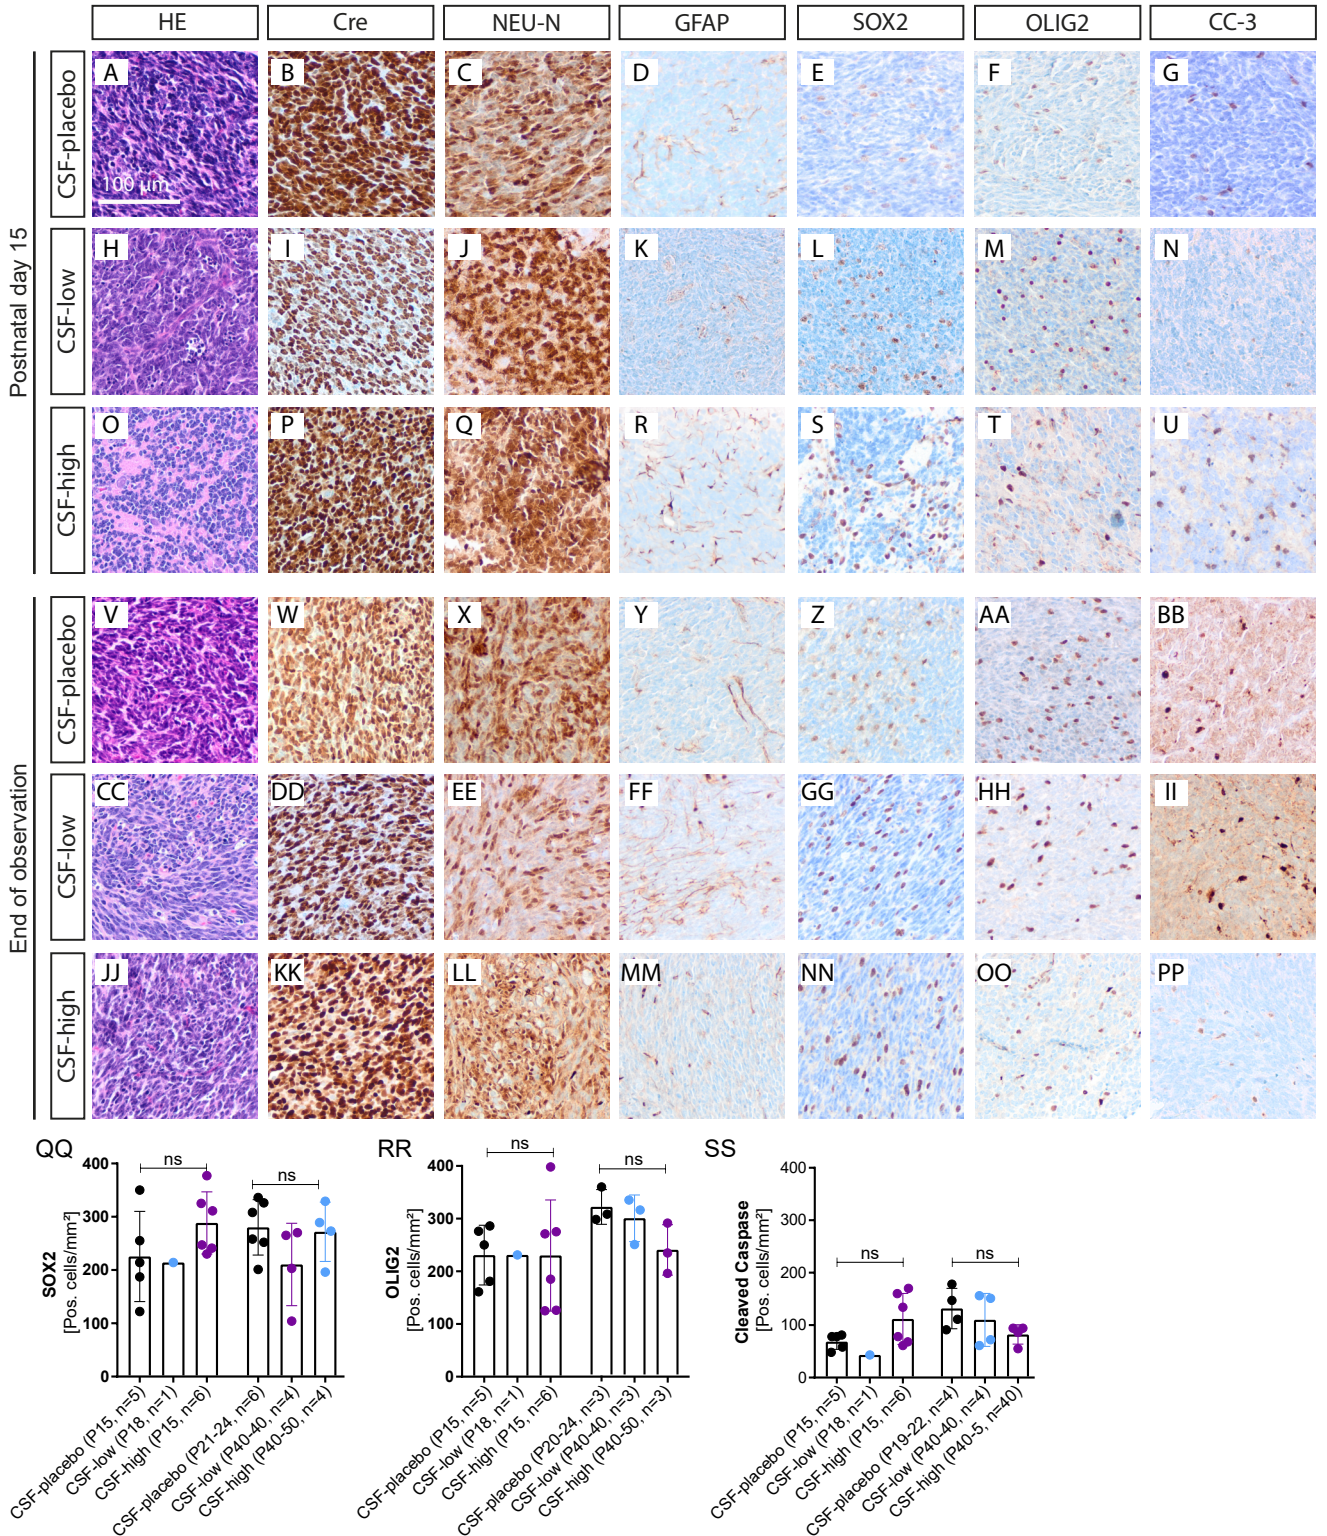

**Supplementary Figure 1: Immunohistochemical stainings of neuronal and glial differentiation markers and an apoptosis marker in tumors at P15 and P50.** No relevant differences in the expression of NeuN, GFAP, OLIG2, SOX2, and Cleaved Caspase-3 was detected between the treatment groups CSF-placebo, CSF-low, and CSF-high. Tukey's test was performed, p values >0.05 were rated not significant.

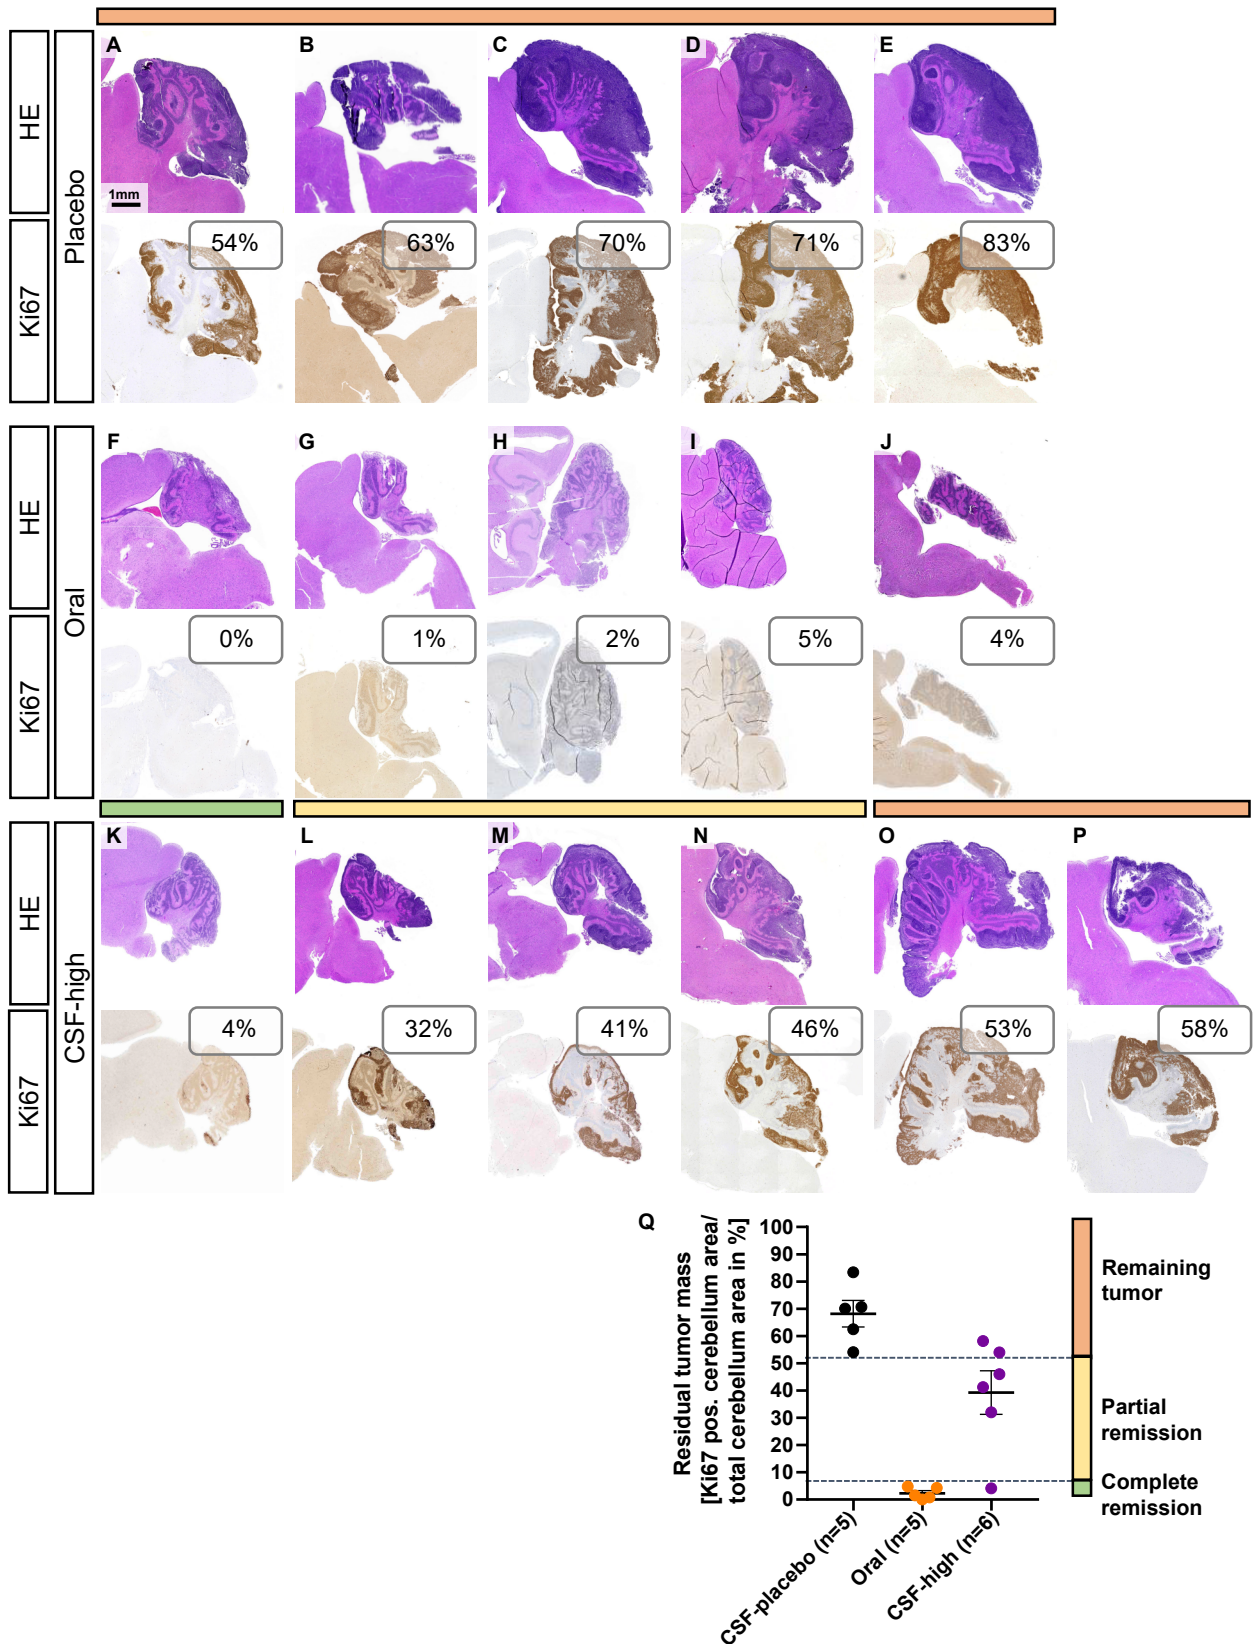

**Supplementary Figure 2: Response evaluation on day 15 shows a promising effect of intraventricular treatment with Vismodegib.** Median sagittal H&E and Ki67 stained brain sections of all observed treatment groups on day 15 are shown (A-P). The treatment response was evaluated by the relative proliferative cerebellar area (Ki67 positive cerebellum area/ total cerebellum area in %) and is shown in the upper right corner of each Ki67 stained brain section. Placebo treated mice display a residual tumor mass of 54-83% (A-E). The residual tumor mass of orally treated mice is 0-5% (F-J). Based on these results, three outcomes were defined: Complete remission with a tumor mass of  $\leq 5\%$ , residual tumor with a tumor mass of  $\geq 50\%$ , and partial remission with a tumor mass of 6-49% (U). Within the CSF-high group one tumor is in complete remission (K), three are in partial remission (L, M, N), and two have remaining tumors (O, P). Scale bar in Panel A corresponds to 1mm in all panels.

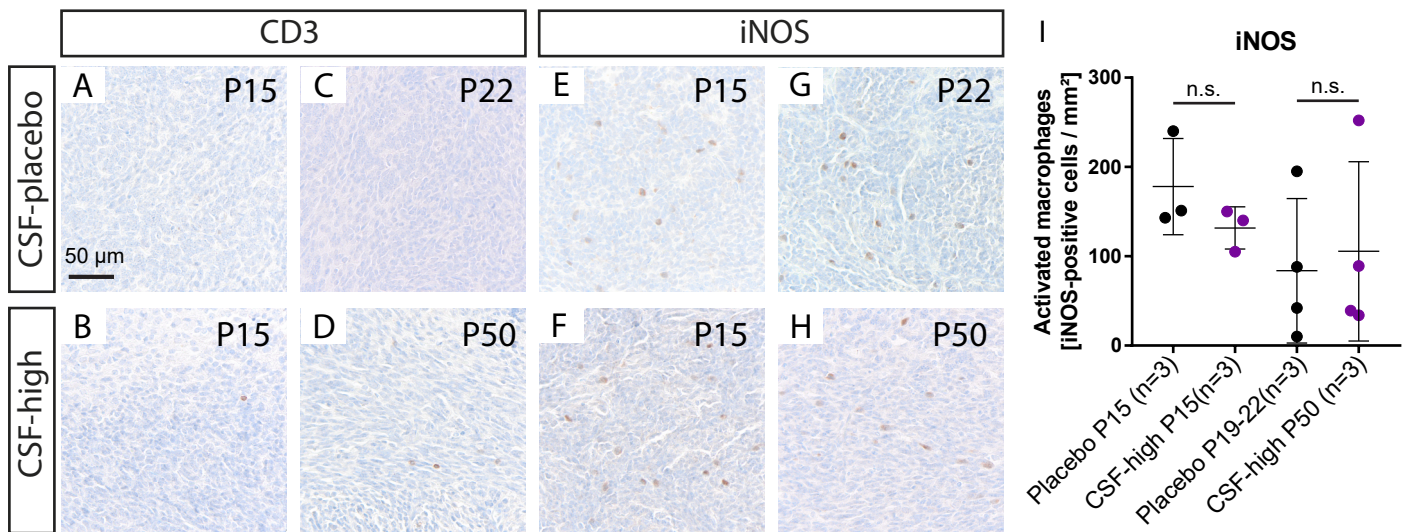

**Supplementary Figure 3: Immune microenvironment in Placebo treated and CSF-high treated *Math1-cre::Ptch1Fl/Fl* mice.** Immunostaining for CD3 reveals little to no immune infiltration by T-cells both after Placebo and CSF-high treatment at an early time point after treatment (P15) (A-B) and at sacrifice due to tumor-related symptoms (P19-P22 for placebo, P47-P50 for CSF-high) (C-D). Immunostaining for iNOS reveals comparable numbers of M1 activated macrophage per tumor area after placebo and CSF-high treatment at both time points (E-H). Quantification of iNOS-positive cells in 4 non-overlapping high power fields per tumor shows no significant difference between placebo and CSF-high treatment (student's t-test,  $p > 0.05$  in both comparisons).

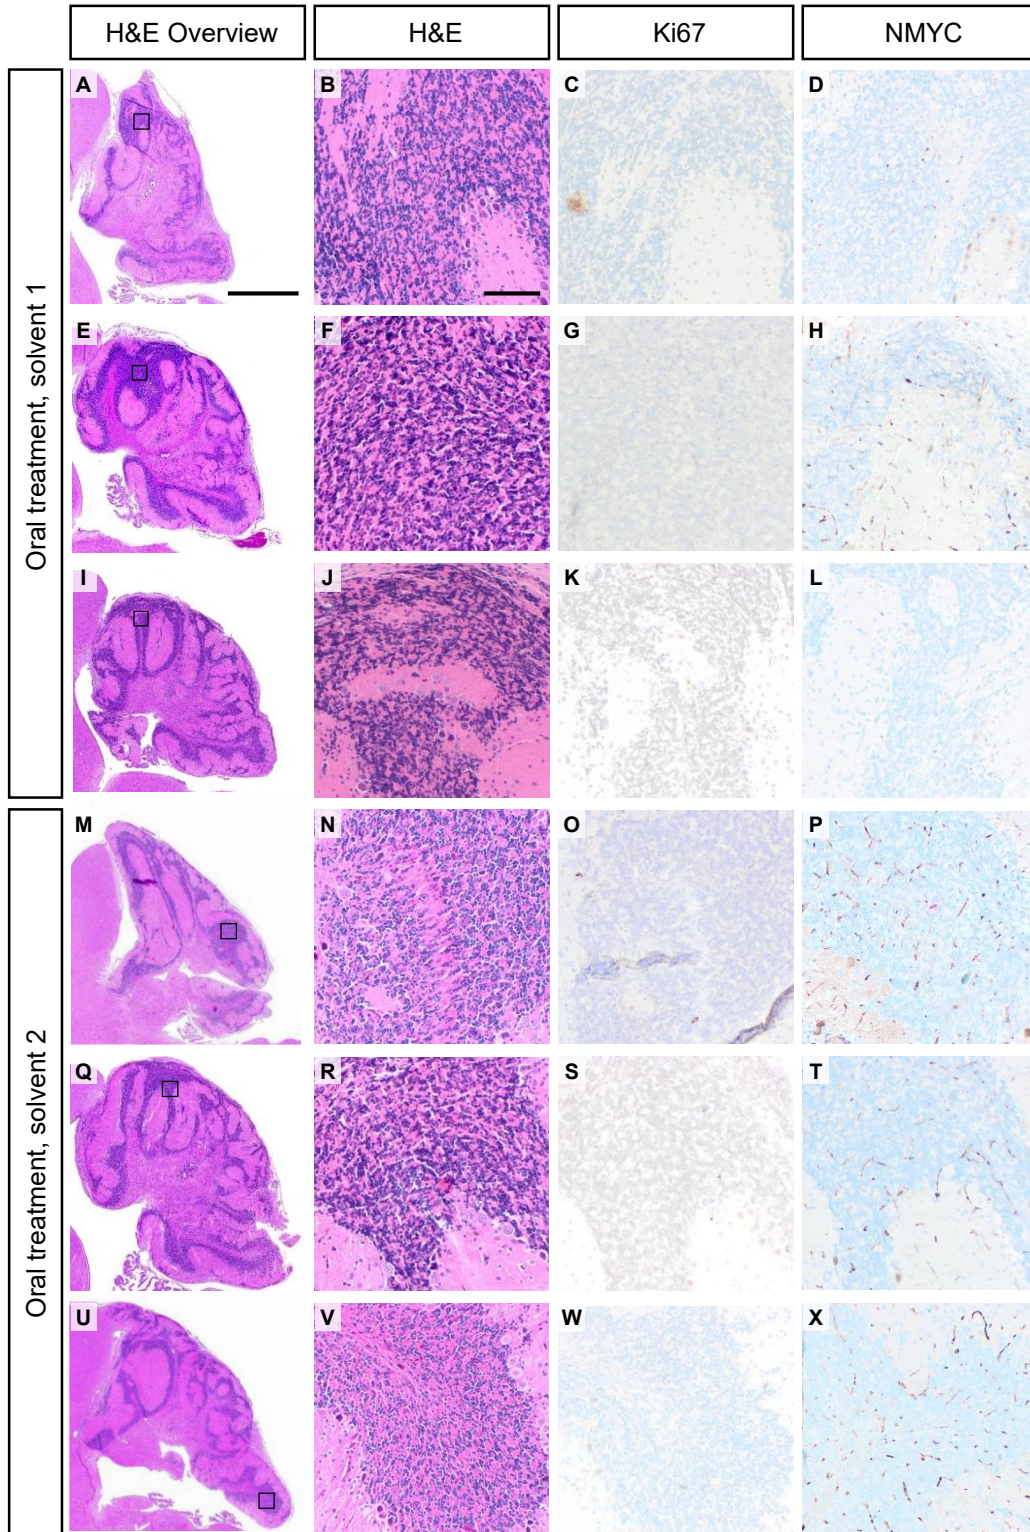

**Suppl. Fig. 4:** Cell accumulation found in orally treated group consists of non-tumor cells. H&E stained sagittal sections of the cerebella of orally treated mice show cell accumulations at the end of observation (**A, E, I, M, Q, U**). Squares mark the corresponding high power fields. The cells are monomorphic, tightly packed, small, and hyperchromatic (**B, F, J, N, R, V**). No considerable proliferation was observed within the cell accumulations (**C, G, K, O, S, W**). Furthermore, no NMYC signal was detected (**D, H, L, P, T, X**). Scale bars correspond to 1000  $\mu$ m in panels **A, E, I, M, Q** and **U** and to 50  $\mu$ m in panels **B-D, F-H, J-L, N-P, R-T** and **V-X**.
